# Supplementary material for: Use of an age-simulation suit as an empathy-building method for dental students: a pre-post study
Source: PeerJ. 2024 Aug 21;12:e17908. doi: 10.7717/peerj.17908 (PMC11344535; doi:10.7717/peerj.17908)
Supplement: Data S1 [file peerj-12-17908-s001.xlsx]

## Sheet: Hoja1
ID	AGE	SEX	HEIGHT	WEIGHT	BMI	PRE SCORE EMPHATHY	PRE TMMS-24: ATENTION	PRE TMMS-24: CLARITY	PRE TMMS-24: REPAIR	PRE: Positive and Negative Affect Schedules (+)	PRE: Positive and Negative Affect Schedules (-)	POST SCORE EMPHATHY	POST TMMS-24: ATENTION	POST TMMS-24: CLARITY	POST TMMS-24: REPAIR	POST: Positive and Negative Affect Schedules (+)	POST: Positive and Negative Affect Schedules (-)	Would you consider empathy necessary in dental students?	do you find the activity interesting?	do you consider the activity useful?	Do you consider the activity appropriate to foster empathy?	Do you consider the activity recommendable for other healthcare professionals?	Indicate what sensations you have experienced during the use of the suit.	Indicate what sensations you have experienced after taking off the suit.	Considers that this activity should be repeated at the end of graduate training.
5468A	22	woman	1.62	53	20.1951	95	23	30	29	30	27	99	23	27	26	33	15	5	5	3	4	5	not being able to walk see and hear bad dizziness	relief, I saw the capacities and facilities of the young people	No
9918P	20	woman	1.58	47	18.8271	80	30	22	31	34	15	88	31	22	26	33	11	5	4	5	4	5	weight, difficulty writing, lack of mobility	relieved and grateful	No
2022Z	20	woman	1.67	51	18.2868	85	26	32	27	33	22	83	31	26	25	38	19	5	4	4	4	5	Not to listen or to write	Released	Yes
1305M	20	woman	1.62	55	20.9572	87	28	20	34	37	26	94	27	19	30	40	26	5	5	5	5	5	not listening, the weight	Released	No
1523V	20	woman	1.65	67	24.6097	67	31	20	22	21	17	76	30	30	28	21	11	5	5	5	5	5	Stiffness of the neck the weight on feet and arms	Lightweight and comfortable	Yes the last year
1523R	20	woman	1.6	58	22.6562	95	22	27	36	37	16	93	22	29	35	19	17	5	5	5	5	5	Seeing and hearing wrong	relieved and relaxed	Yes
7371P	20	woman	1.65	50	18.3655	94	17	20	31	44	17	106	10	18	34	41	15	5	5	5	5	5	Poor Seeing and Stiffness	Light and soothed	Yes
0302R	25	woman	1.67	54	19.3625	108	33	35	37	38	16	94	34	34	35	42	34	5	5	5	5	5	Seeing and hearing wrong, effort	Free and young	Yes
199L	24	woman	1.56	51.8	21.2853	86	24	32	24	32	21	85	81	33	24	34	24	5	5	5	5	5	not to hear or see,	Relieved	Yes
2912L	19	man	1.78	69.5	21.9354	90	37	34	35	37	13	87	23	32	35	39	17	5	5	4	4	5	neck stiffness, heaviness	released, much better	Yes
1234E	26	woman	1.59	53	20.9644	81	31	22	19	24	16	95	31	18	19	28	17	5	4	4	4	4	not seeing or hearing not being able to write	Relieved and light	Yes
1998H	25	woman	1.62	61	23.2434	92	30	21	28	37	29	104	37	28	26	34	27	5	5	5	5	5	Weight Burden	relief	Yes
30382214	20	woman	1.7	60	20.7612	96	31	17	23	33	18	86	29	18	27	39	32	5	5	5	5	5	not listening, slowness,	relieved release, with great mobility	Yes
281100	23	woman	1.6	67	26.1719	81	29	25	32	29	21	99	26	33	36	37	17	5	4	4	4	4	not to hear or see,	Relieved and light	Yes
1301L	20	woman	1.65	60	22.0386	99	38	28	25	48	17	95	37	30	25	50	26	5	5	5	5	5	stiff neck, vision	Light and young	Yes
2805M	20	woman	1.67	63	22.5896	83	36	36	24	42	26	81	38	37	27	50	26
2402M	20	woman	1.66	50	18.1449	82	31	31	31	35	20	88	32	28	29	33	29	5	4	5	5	5	not hearing, being able to write, tiredness	Free and agile	Yes
5058R	20	woman	1.55	54	22.4766	91	40	33	37	38	36	89	39	32	30	38	32	5	5	5	5	5	View, rigidity	Liberated relieved	Yes
1012A	20	woman	1.6	67	26.1719	85	20	29	38	45	26	99	29	24	36	47	17	5	5	5	5	5	Not hearing or seeing, moving badly	Relieved	Yes
2003A	19	woman	1.7	60	20.7612	95	37	39	39	34	18	89	30	23	28	36	24	5	5	5	5	5	wrists and neck	liberation	Yes
8888I	20	woman	1.67	50	17.9282	91	37	28	30	40	40	94	39	29	27	37	48	5	4	5	5	5	Weight of feet and wrists	liberation	Not once is enough
3505P	21	woman	1.61	55	21.2183	91	38	31	33	42	18	91	35	36	42	46	21	5	5	4	5	5	the sight and the neck and wrists	Liberated and relieved, fresh	No
3105C	22	woman	1.59	60	23.7332	84	38	31	39	39	33	29	33	29	33	37	40	5	5	5	5	5	seeing and hearing badly, the burden of weight	liberation	Yes
0216A	20	woman	1.63	52	19.5717	90	25	23	32	33	23	94	36	24	31	34	19	5	4	5	5	5	Not seeing or being able to write	liberation	Yes
1997H	26	man	1.73	93	31.0735	87	12	29	20	33	38	90	17	25	20	32	33
1511A	44	woman	1.68	100	35.4308	85	20	28	39	45	21	83	24	35	38	50	14						Neck and wrists hard to write	Relieved and light	No but I'll remember
3107A	20	woman	1.67	59	21.1553	73	32	26	28	33	17	88	29	16	20	29	19	5	4	4	5	4	not even listening, the rigidity, the weight	relieved and grateful	Yes
2003A	20	woman	1.7	63	21.7993	92	28	40	40	47	15	93	37	40	40	34	21	5	5	5	5	5	Not seeing the worst after not listening	Lighter and cooler	Yes
1326 A	20	man	1.8	65	20.0617	82	30	25	28	35	24	96	27	28	31	36	21	5	4	5	4	5	not hearing, stiff neck, heavy hands	liberated	No
1326 A'	20	man	1.84	79	23.3341	87	26	31	28	30	30	95	25	30	35	33	28	5	4	4	4	5	the burden of weight, the vest	Relieved	Yes and try more moves
2609M	20	woman	1.76	55	17.7557	89	39	29	25	35	35	89	39	29	27	34	34	5	5	4	4	5	Not seeing or hearing	Lightweight and fresh
5730A	20	man	1.78	78	24.6181	103	18	27	23	41	36	97	19	30	22	39	36	5	4	5	4	5	Silence and the neck	Liberation and lightness	Yes
1973A	20	woman	1.73	60	20.0474	94	28	20	17	29	21	95	38	17	20	32	24	4	3	3	3	3	going down stairs, getting up from the couch	relief, regaining energy, more connection with others	No, I won't forget the feeling
2413M	20	woman	1.72	65	21.9713	93	34	35	38	33	20	96	27	25	38	31	14	5	3	4	5	5	Not listening	Relief and comfort	No
0208M	27	woman	1.63	62.6	23.5613	70	34	35	22	47	21	85	36	33	23	49	18	5	3	5	5	5	not listening, and lack of agility	relieved, freedom of movement, more energy	Yes
7737A	29	woman	1.59	58.7	23.219	94	28	31	34	44	17	90	33	27	33	43	11	5	5	5	5	5	not listening, stiff neck, instability	Free and young	No, I'll always remember
1234C	24	woman	1.72	62	20.9573	84	39	39	35	48	19	89	39	40	32	47	16	5	5	5	5	5	vision, knees, and weight	free relieved, happy, young	Yes
6617A	20	man	1.75	53	17.3061	86	40	30	28	45	43	93	38	27	26	47	40	5	5	5	5	5	vision and hearing	Relief, Liberation	No, I won't forget
2212F	29	man	1.7	68	23.5294	86	28	33	36	46	19	99	28	32	39	47	18	5	5	5	5	5	hearing and tiredness	Light and young with a desire to run
6332Y	26	woman	1.65	50	18.3655	88	35	29	25	40	17	83	29	23	26	41	16	5	5	5	5	5	Hearing and weight	relieved with the desire to take care of myself and exercise	Yes, more activities in this regard are necessary.
5392G	22	woman	1.69	53	18.5568	91	37	32	33	39	12	88	38	33	31	41	11	5	5	5	5	5	weight on the legs, not seeing or hearing,	Instant relief	Yes
1234B	21	man	1.8	60	18.5185	90	32	35	37	41	24	83	36	38	33	41	22	5	5	5	5	5	neck weight when going down stairs sight writing,	Relieved and light	Yes
2792R	20	woman	1.6	55	21.4844	96	33	27	20	44	40	85	31	21	17	43	45	5	5	5	5	5	not listening and not controlling the body	Relieved	Yes
1326E	28	woman	1.6	70	27.3437	92	37	40	34	48	15	97	40	40	30	50	13	5	5	5	5	5	joint stiffness, insecurity when walking vision.	freedom of movement good vision	Yes
1122D	29	woman	1.56	50	20.5457	93	32	37	33	37	11	92	36	36	36	35	10	5	5	5	5	5	the collar, the weight, tiredness, fatigue, apathy, not listening.	relief	Yes
7605R	21	man	1.7	65	22.4913	92	17	23	29	33	15	99	16	22	30	28	18	5	5	5	5	5	neck, vision, and hearing	relieved and relaxed	No
51146R	23	man	1.72	78	26.3656	88	27	32	35	39	29	97	34	36	35	42	20	5	4	4	5	5	limited weight, vision and hearing	Relief, joy, free.	Yes
0809D	27	woman	1.72	53	17.9151	89	22	31	29	35	14	90	17	37	30	40	15	5	5	5	5	5	I did not hear, difficulty in doing easy actions.	Liberated and lightweight	Yes
0611P	21	man	1.71	62	21.2031	86	27	27	35	37	13	107	24	28	33	38	19	4	5	5	4	5	not to hear or see,	relieved and grateful	Yes
7316G	21	man	1.87	75	21.4476	88	36	24	21	32	40	91	35	29	23	36	29	5	5	5	5	5	not hearing or seeing, very clumsy rigidity	free, more agile, with more energy	Yes
6394I	21	woman	1.61	53	20.4467	95	29	21	22	32	25	95	28	21	23	34	26	5	5	5	5	5	not to hear or see,	Relieved and light	Yes
2907L	27	man	1.72	56	18.9292	85	23	36	31	37	22	101	22	32	32	35	19	5	5	5	5	5	Stiffness of the eye discomfort to breathe	relieved	Yes
7733D	23	man	1.76	94	30.3461	80	23	33	35	36	15	89	24	33	31	35	14	5	5	5	5	5	not hearing or seeing, fatigue	Relieved	Yes
4589H	21	woman	1.67	58	20.7967	85	25	17	17	27	21	84	21	15	21	31	16	5	5	5	5	5	not hearing or seeing the stiffness of the neck, instability	Release and lightness, agile
4814T	32	woman	1.68	66	23.3844	94	26	24	24	37	13	102	22	20	29	36	11	5	5	5	5	5	not to hear or see,	Relieved	Yes
2509M	22	woman	1.68	57	20.1956	93	31	37	31	41	18	91	35	34	33	39	20	4	5	5	4	5	stiff neck, vision	relieved and young
0404I	22	woman	1.63	49	18.4425	88	27	37	33	43	22	83	27	32	31	41	17	5	5	5	4	5	stiff neck, vision	liberation	Yes
6152 A	24	woman	1.6	50	19.5312	91	27	25	28	43	23	95	28	21	18	17	5	5	5	5	5		Neck stiffness, not listening	Relieved and light	Yes
6389 C	21	man	1.75	77	25.1429	81	33	30	21	38	18	88	35	27	25	35	15	5	5	5	5	5	Neck stiffness	Liberated relieved	Yes
6202 P	21	woman	1.64	53	19.7055	89	20	19	30	43	18	97	15	20	36	41	21	5	5	5	5	5	Weight of feet and wrists	Liberation and lightness	Yes
1809M	21	woman	1.5	64	28.4444	86	33	28	19	35	35	94	27	28	22	37	36	4	4	5	5	5	weight, lack of mobility	relieved	No
2002C	21	woman	1.63	52	19.5717	89	26	22	25	39	11	92	23	22	25	39	10	5	5	5	5	5	weight, lack of mobility, tired worried	liberation	No
1011M	22	man	1.83	71	21.201	90	35	34	31	47	12	98	36	34	34	44	10	5	4	5	4	4	weight, lack of mobility, tired worried	liberation
